# Supplementary material for: Synthesis, photo-physicochemical and biological properties of novel tetrahydropyrimidone-substituted metallo-phthalocyanines
Source: Royal Society of Chemistry journal article supplement (doi:10.1039/d4dt02115k), 2024-01-01
Supplement: d4dt02115k1.pdf [file d4dt02115k1.pdf]

## Synthesis, Photo-physicochemical and Biological Properties Novel Tetrahydropyrimidone Substituted Metallo Phthalocyanines

Kevser Harmandar<sup>1</sup>, Esra Nur Kaya<sup>1</sup>, Gülşah Tollu,<sup>2</sup> Ibrahim F. Sengul<sup>1</sup>, Sadin Özdemir<sup>3</sup>,  
Devrim Atilla<sup>1\*</sup>

<sup>1</sup>Gebze Technical University, Department of Chemistry, 41400, Gebze, Kocaeli, Turkey

<sup>2</sup>Laboratory and Veterinary Health, Technical Science Vocational School, Mersin University,  
TR-33343 Mersin, Turkey

<sup>3</sup>Food Processing Programme, Technical Science Vocational School, Mersin University, TR-  
33343 Yenisehir, Mersin, Turkey

### Content:

1. **Material and Methods.**
2. **IR, <sup>1</sup>H NMR, <sup>13</sup>C NMR and Mass Spectra**.....S2-S7
3. **Photophysical and Photochemical Measurements Details**.....S7-S10

**Materials and methods:** IR spectra were recorded between 4000 and 500 cm<sup>-1</sup> using a PerkinElmer Spectrum 100 FT-IR spectrometer with an attenuated total reflection (ATR) accessory featuring a zinc selenide (ZnSe) crystal. MALDI- TOF mass spectrometry analyses were carried out on Bruker microflex LT MALDI-TOF MS spectrometer using dihydroxybenzoic acid as a matrix. <sup>1</sup>H NMR and <sup>13</sup>C NMR spectra were recorded in CDCl<sub>3</sub> and DMSO solutions on a Varian 500 MHz spectrometer. Electronic absorption spectra in the UV–visible region were recorded with a Thermo scientific Evolution 220 UV-Visible spectrophotometer using a 1 cm path length cuvette at room temperature. Fluorescence excitation and emission spectra were recorded on a Varian Eclipse spectrofluorometer using 1 cm path length cuvettes at room temperature. Fluorescence lifetimes were measured by a time correlated single photon counting (TCSPC) method using FLUOROLOG-3 spectrofluorometer (Horiba JobinYvon, Edison, NJ) equipped with a NanoLED and a standard air cooled R928 PMT detector. Photo-irradiations were done by using a General Electric quartz line lamp (300W). A 600 nm glass cut off filter (Schott) and a water filter were used to filter off ultraviolet and infrared radiations, respectively. An interference filter (Intor, 670 nm with a band width of 40 nm) was additionally placed in the light path before the sample. Light intensities were measured with a POWER MAX5100 (Mol electron detector

incorporated) power meter. All solvents and chemicals were of reagent-grade quality, purchased from Sigma Aldrich Chemical Co. and Merck.

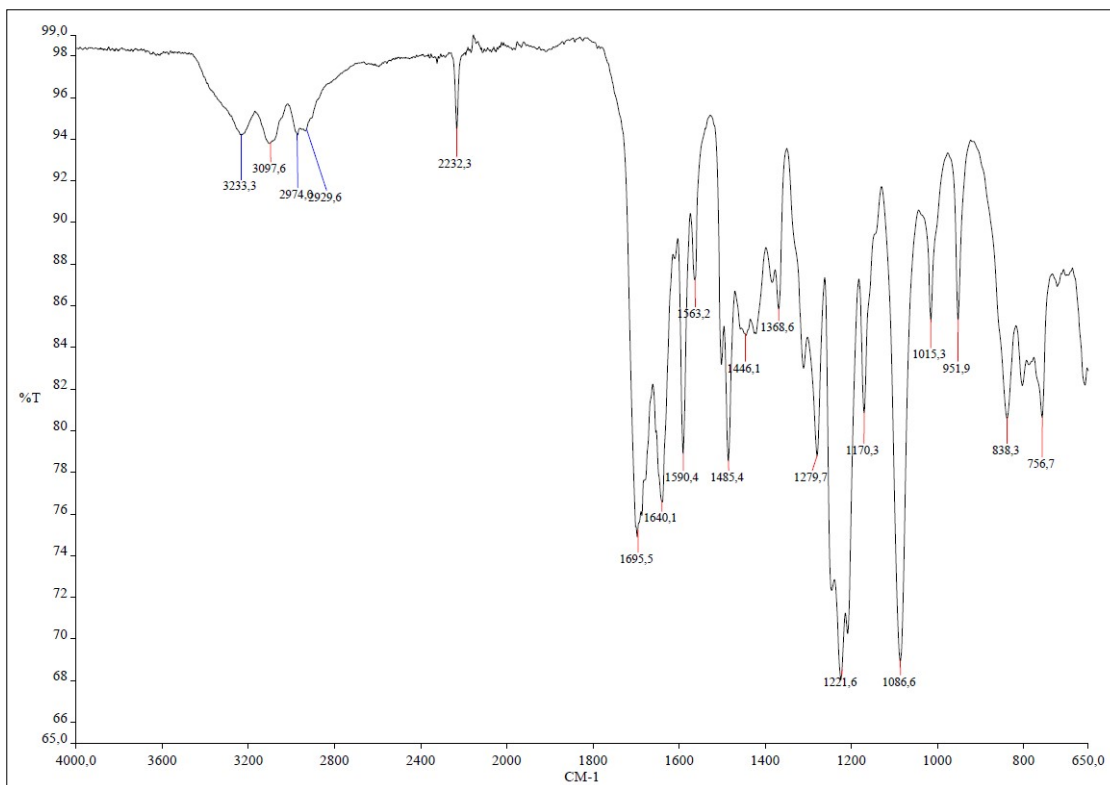

**Fig. S1.** FT-IR spectrum of compound 3.

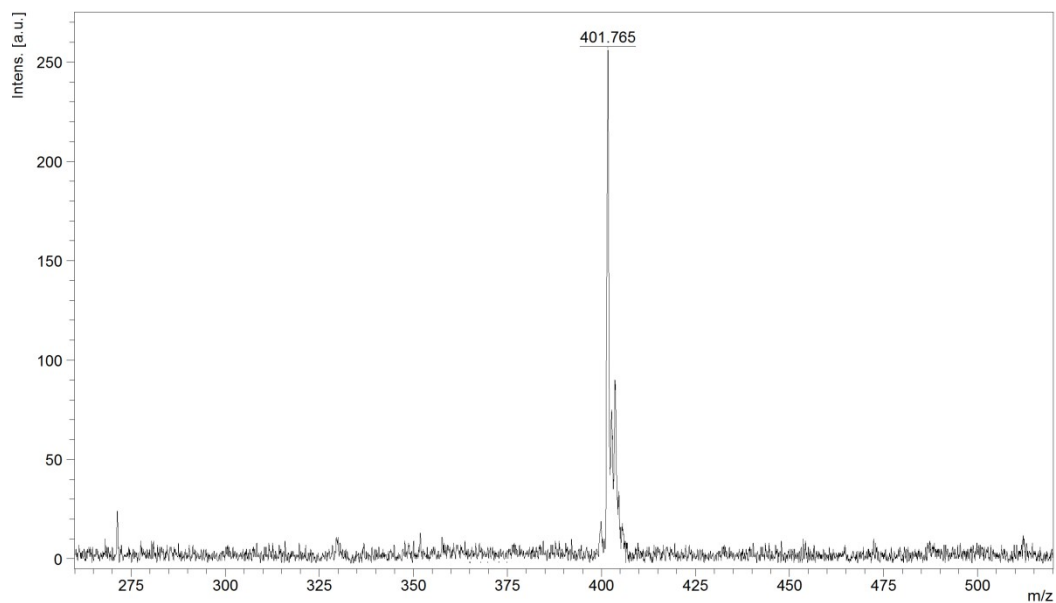

**Fig. S2.** MALDI-TOF mass spectrum of compound 2 (DHB).

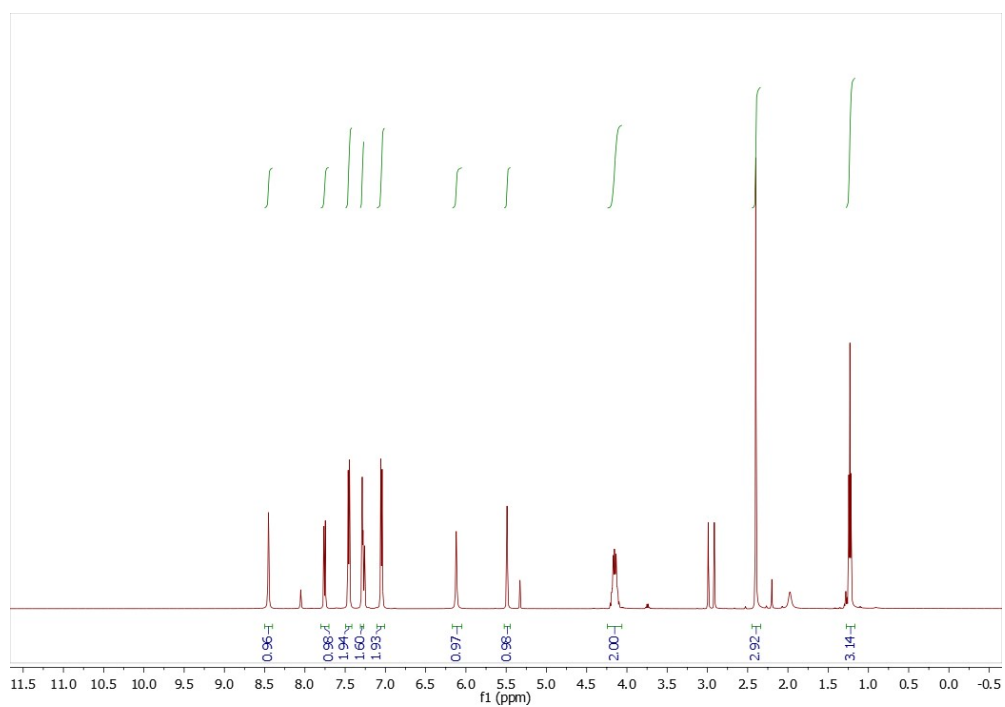

**Fig. S3.**  $^1\text{H}$  NMR spectrum of compound **3** (500 MHz, in  $\text{CDCl}_3$ ).

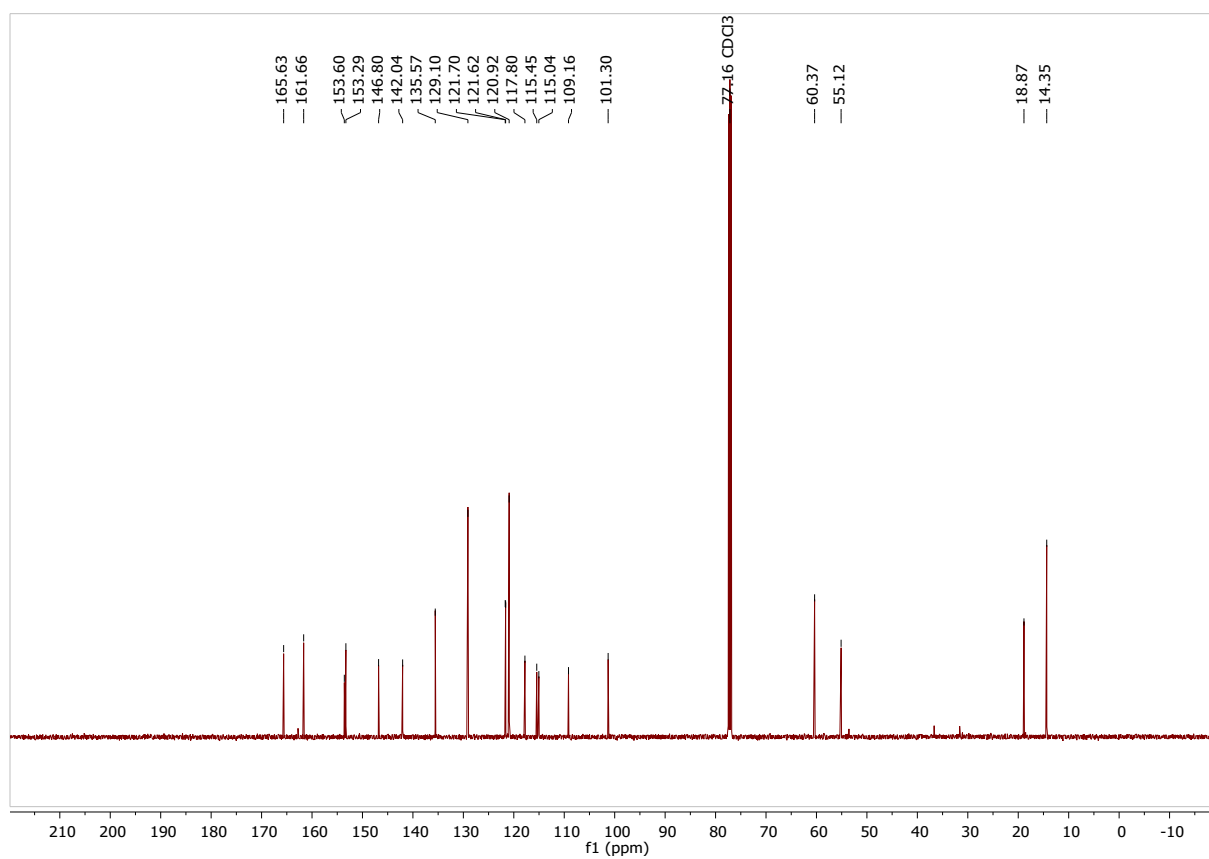

**Fig. S4.**  $^{13}\text{C}$  NMR spectrum of compound **3** (125 MHz, in  $\text{CDCl}_3$ ).

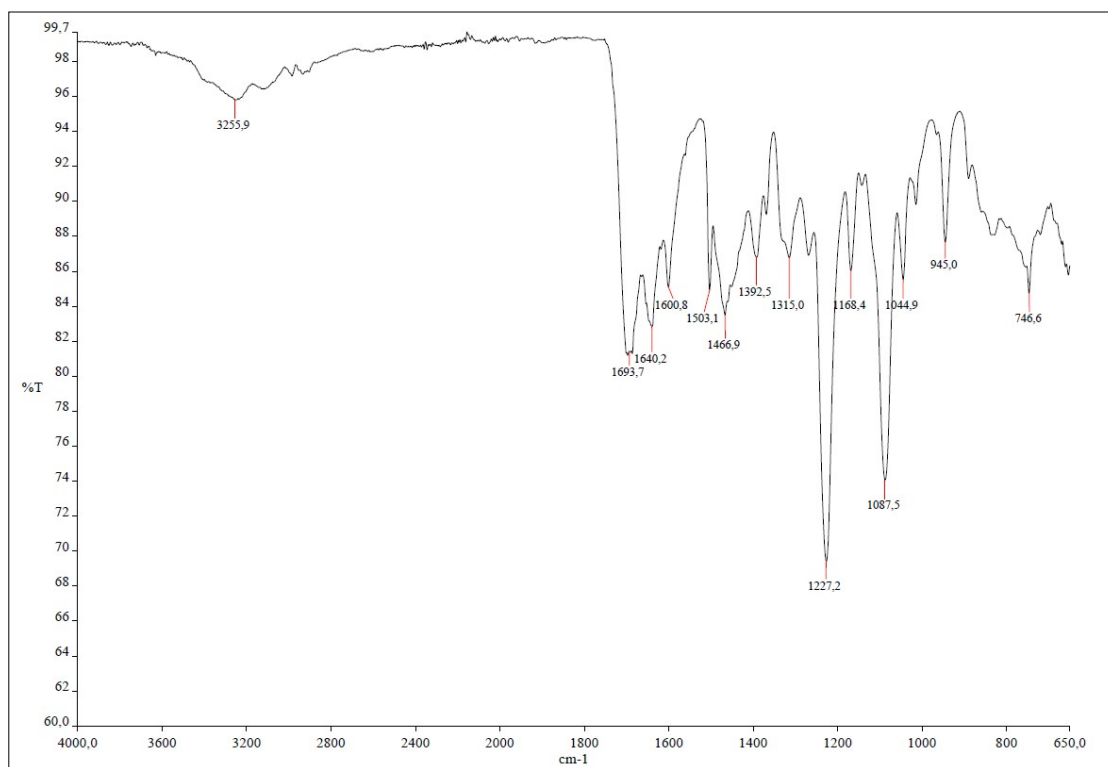

**Fig. S5.** FT-IR spectrum of compound 4.

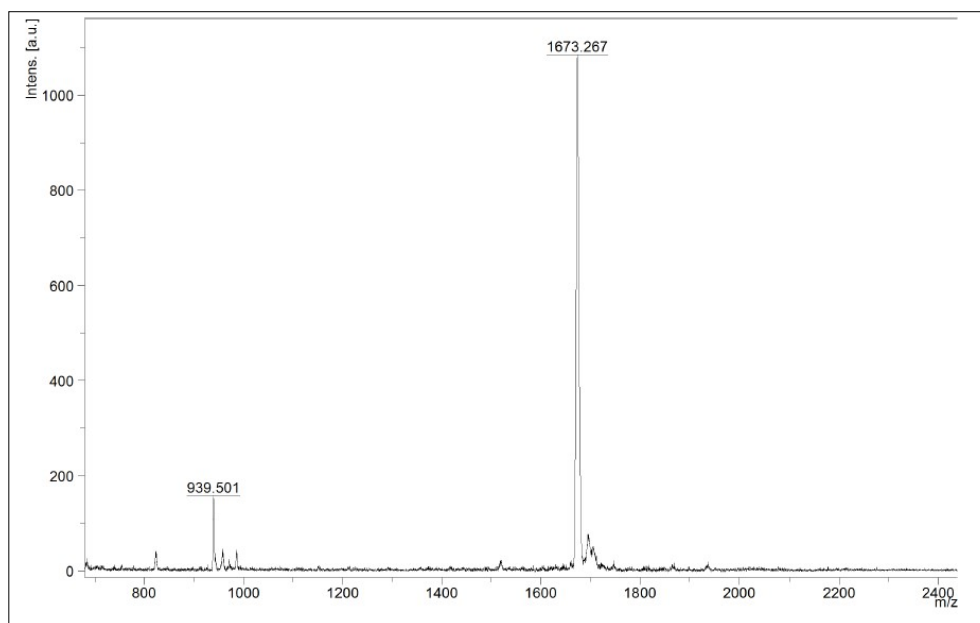

**Fig. S6.** MALDI-TOF mass spectrum of compound 4 (DIT).

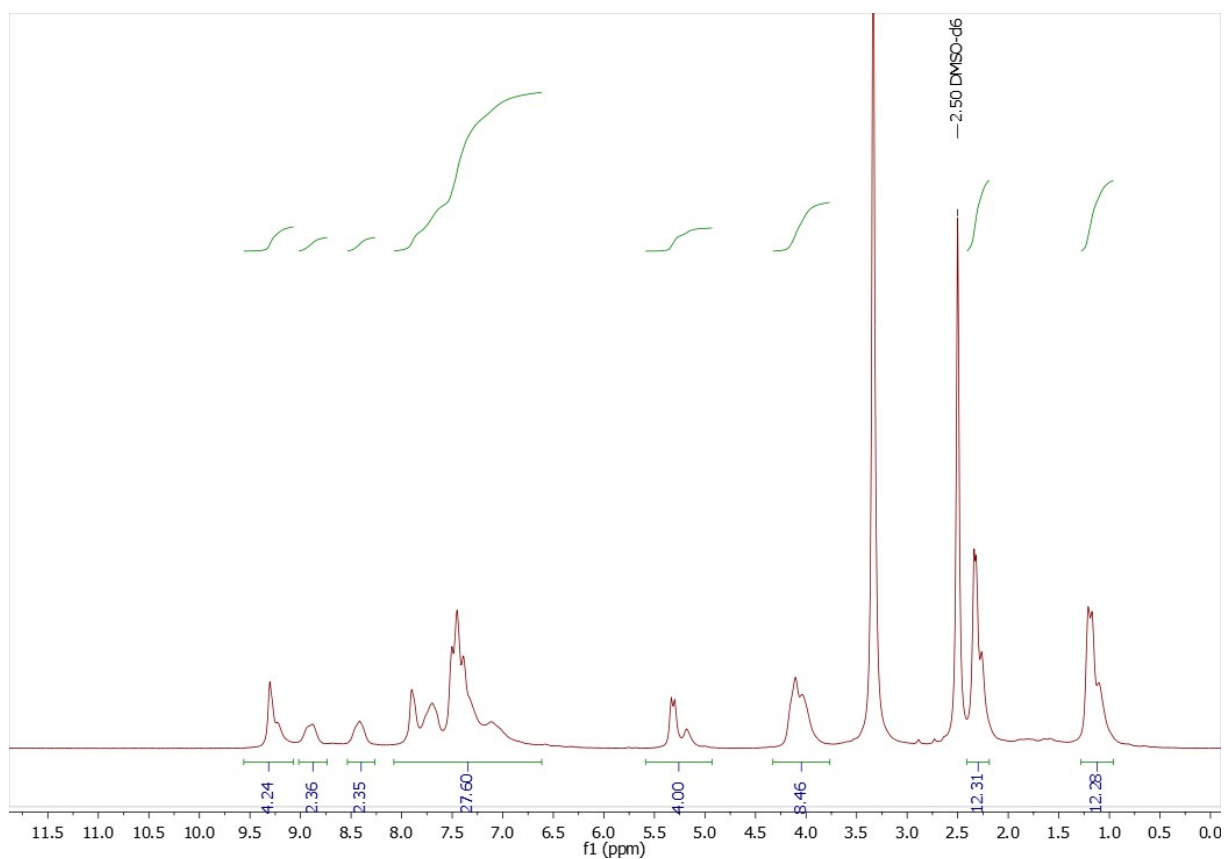

**Fig. S7.** <sup>1</sup>H NMR spectrum of compound **4** (500 MHz, in DMSO-d<sub>6</sub>).

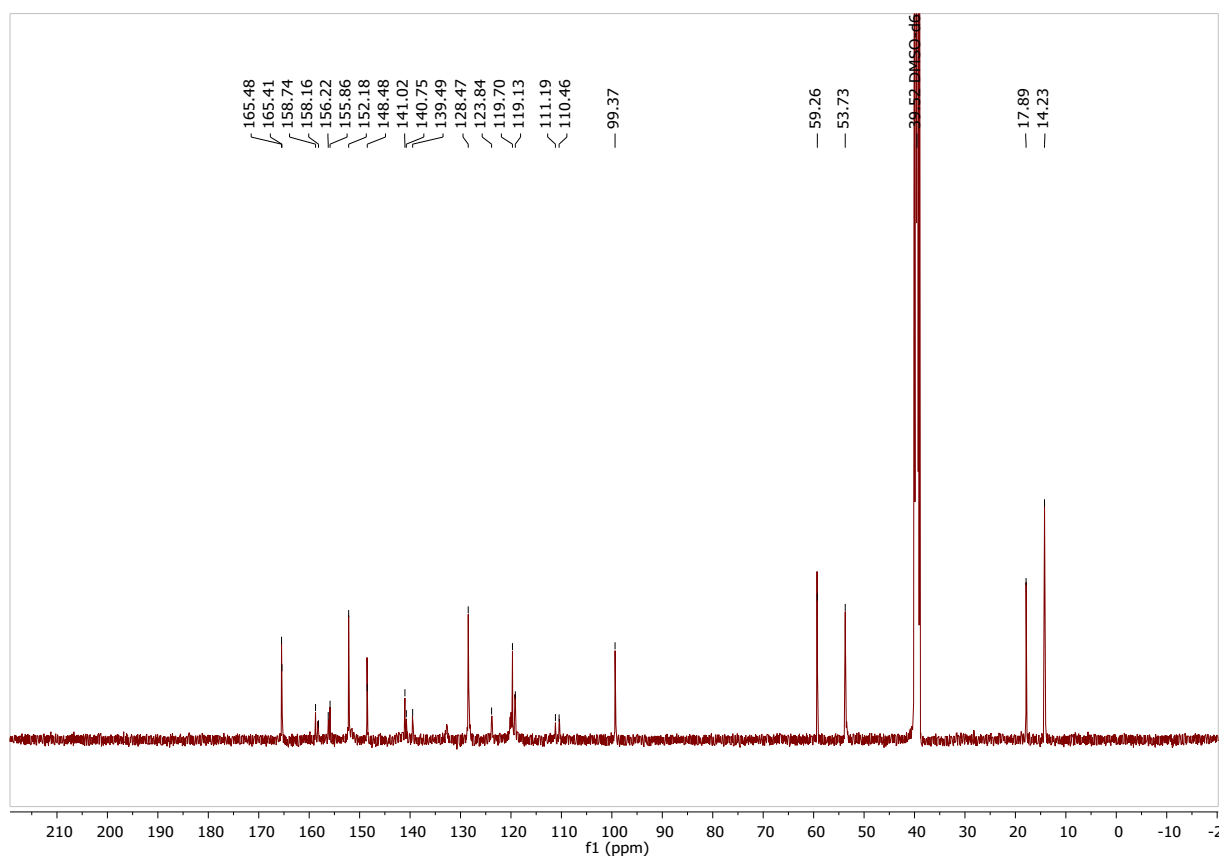

**Fig. S8.** <sup>13</sup>C NMR spectrum of compound **4** (125 MHz, in DMSO-d<sub>6</sub>).

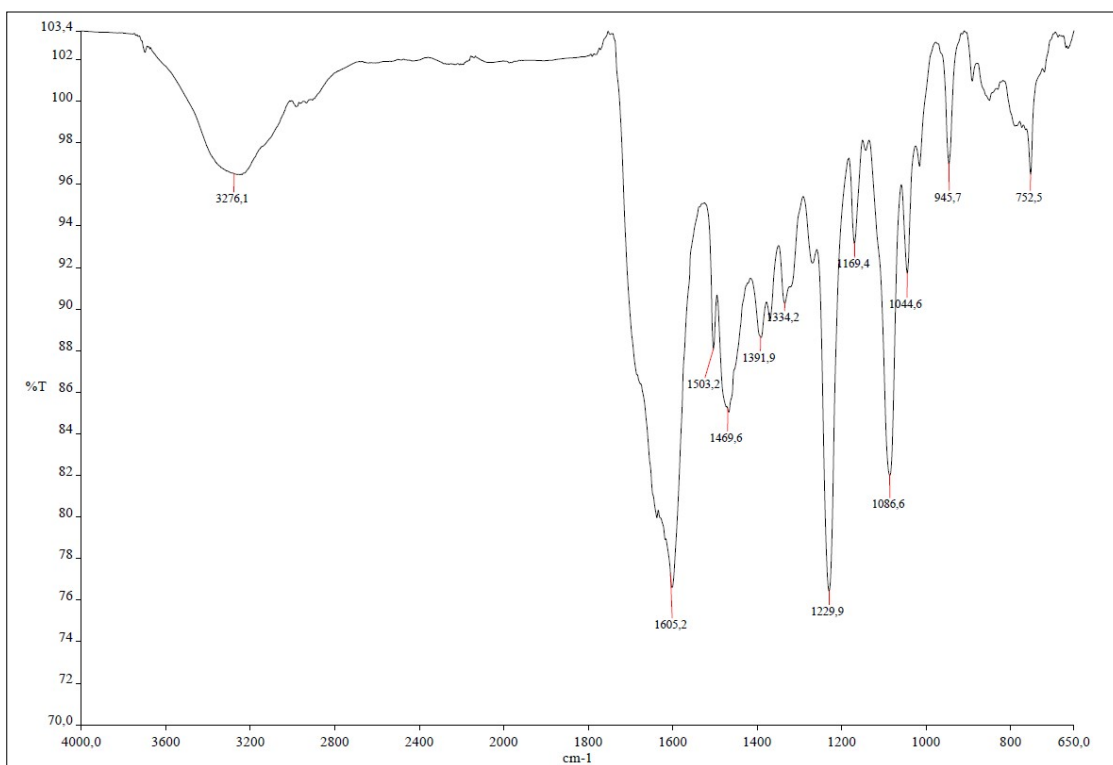

**Fig. S9.** FT-IR spectrum of compound 5.

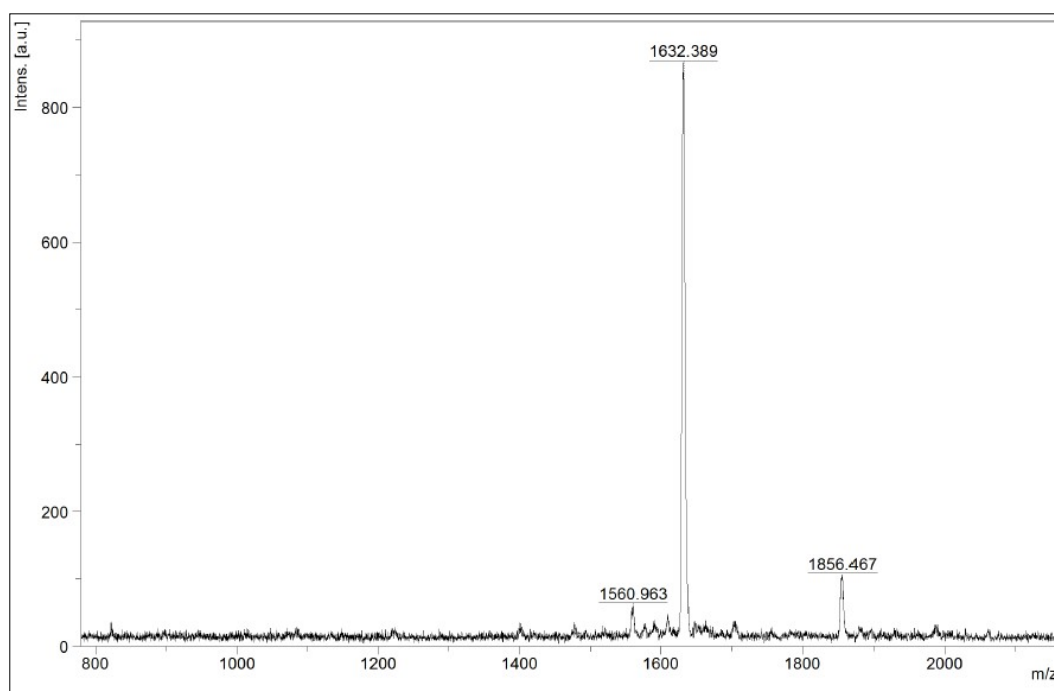

**Fig. S10.** MALDI-TOF mass spectrum of compound 5 (DIT).

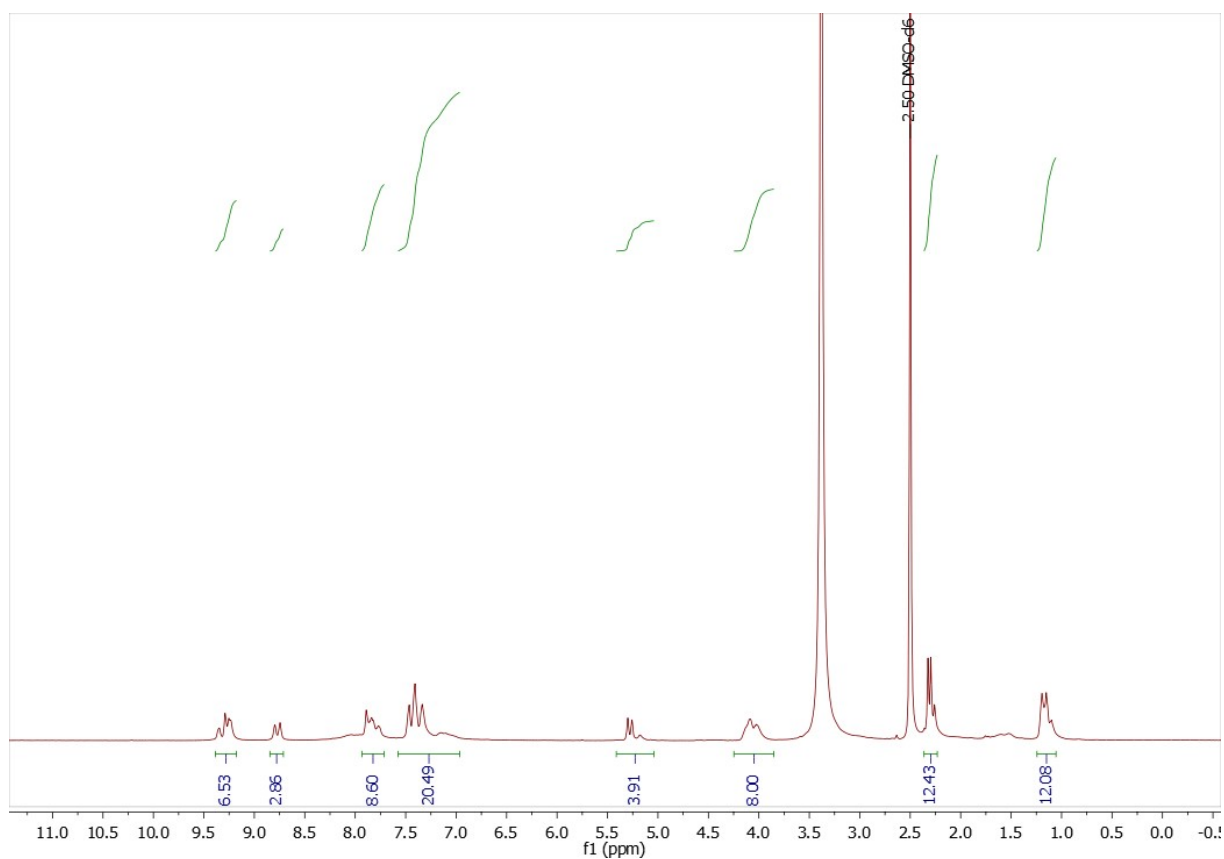

**Fig. S11.** <sup>1</sup>H NMR spectrum of compound **5** (500 MHz, in DMSO-d<sub>6</sub>).

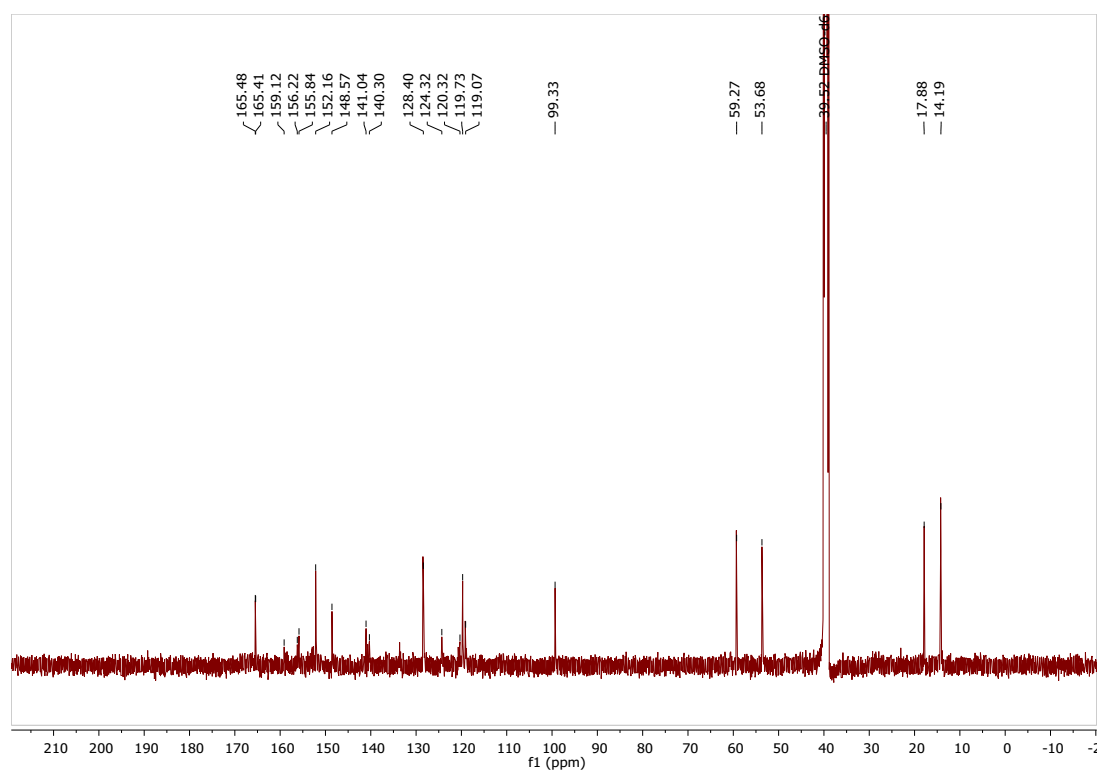

**Fig. S12.** <sup>13</sup>C NMR spectrum of compound **5** (125 MHz, in DMSO-d<sub>6</sub>).

## Photophysical parameters

### Fluorescence quantum yields and lifetimes

Fluorescence quantum yields ( $\Phi_F$ ) were determined by the comparative method using (Equation 1)<sup>1,2</sup>

$$\Phi_F = \Phi_F(\text{Std}) \frac{F \cdot A_{\text{Std}}}{F_{\text{Std}} \cdot A} \quad (1)$$

where  $F$  and  $F_{\text{Std}}$  are the areas under the fluorescence emission curves of the samples (**4** and **5**) and the standard, respectively.  $A$  and  $A_{\text{Std}}$  are the relative absorbance of the samples (**4** and **5**) and standard at the excitation wavelength, respectively. Unsubstituted **ZnPc** was employed as the standard ( $\Phi_F = 0.20$  in DMSO).<sup>3</sup>

Fluorescence lifetime measurements were performed with FLUOROLOG-3 spectrofluorometer instrument using TCSPC technique. A NanoLED was used as a light source, and standard air cooled R928 PMT as a detector. The instrumental response function was measured with Ludox® (Sigma-Aldrich) colloidal solution at excitation wavelengths of samples. Signals were acquired using a Datastation FluoroHub-B single photon counting controller and data analysis was performed using the commercially available DAS 6 decay analysis software package from Horiba JobinYvon. Goodness of fit was assessed by minimizing the reduced chi squared function, each trace contained 10000 points and the reported lifetime values are the result from at least three independent measurements.

### Photochemical parameters

#### Singlet oxygen quantum yields

Singlet oxygen quantum yield ( $\Phi_\Delta$ ) determinations were carried out using the experimental set-up described in literature.<sup>4</sup> Typically, a 3 mL portion of the respective substituted zinc(II) phthalocyanine solutions (concentration =  $1 \times 10^{-5}$  M) containing the singlet oxygen quencher was irradiated in the Q band region with the photo-irradiation set-up described in the reference.<sup>4</sup> The  $\Phi_\Delta$  values were determined in air using the relative method with unsubstituted ZnPc (in DMSO) as a standard. 1,3-diphenylisobenzofuran (DPBF) was used as chemical quencher for singlet oxygen in DMSO. The  $\Phi_\Delta$  values of the studied zinc(II) phthalocyanines were calculated using equation 2:

$$\Phi_\Delta = \Phi_\Delta^{\text{Std}} \frac{R \cdot I_{\text{abs}}^{\text{Std}}}{R^{\text{Std}} \cdot I_{\text{abs}}}$$



(2)

where  $\Phi_{\Delta}^{\text{Std}}$  is the singlet oxygen quantum yield for the standard unsubstituted ZnPc ( $\Phi_{\Delta}^{\text{Std}} = 0.67$  in DMSO).<sup>3</sup> R and R<sub>Std</sub> are the DPBF photobleaching rates in the presence of the respective samples (4 and 5) and standard, respectively.  $I_{\text{abs}}$  and  $I_{\text{abs}}^{\text{Std}}$  are the rates of light absorption by the samples and standard, respectively.  $I_{\text{abs}}$  was determined by using equation 3.

$$I_{\text{abs}} = \frac{\alpha \cdot S \cdot I}{N_A} \quad (3)$$

To avoid chain reactions induced by DPBF in the presence of singlet oxygen<sup>5</sup> the concentration of quenchers (DPBF) was lowered to  $\sim 3 \times 10^{-5}$  M. Solutions of sensitizers (concentration =  $1 \times 10^{-5}$  M) containing DPBF were prepared in the dark and irradiated in the Q band region using the setup described in literature.<sup>4</sup> DPBF degradation at 417 nm was monitored. The light intensity used for  $\Phi_{\Delta}$  determinations was found to be  $6.51 \times 10^{15}$  photons  $\text{s}^{-1} \text{cm}^{-2}$ .

### Photodegradation quantum yields

Photodegradation quantum yield ( $\Phi_d$ ) determinations were carried out using the experimental set-up described in literature.<sup>4</sup> Photodegradation quantum yields were determined using equation 4,

$$\Phi_d = \frac{(C_0 - C_t) \cdot V \cdot N_A}{I_{\text{abs}} \cdot S \cdot t} \quad (4)$$

where  $C_0$  and  $C_t$  are the samples (4 and 5) concentrations before and after irradiation respectively, V is the reaction volume,  $N_A$  is the Avogadro's constant, S is the irradiated cell area, t is the irradiation time and  $I_{\text{abs}}$  is the overlap integral of the radiation source light intensity and the absorption of the samples (4 and 5). A light intensity of  $2.17 \times 10^{16}$  photons  $\text{s}^{-1} \text{cm}^{-2}$  was employed for  $\Phi_d$  determinations.

## References

- 1-) S. Fery-Forgues and D. Lavabre, *J. Chem. Educ.*, 1999, **76**, 1260–1264
- 2-) M. D. Maree, T. Nyokong, K. Suhling and D. Phillips, *J. Porphyr. Phthalocyanines*, 2002, **6**, 373–376.
- 3-) A. Ogunsipe, J.-Y. Chen and T. Nyokong, *New J. Chem.*, 2004, **28**, 822–827.
- 4-) M. Durmuş, Photosensitizers in Medicine, Environment, and Security, in: T. Nyokong, V. Ahsen (Ed.) Springer: New York, 2012, pp. 141.
- 5-) W. Spiller, H. Kliesch, D. Wöhrle, S. Hackbarth, B. Röder and G. Schnurpfeil, *J. Porphyr. Phthalocyanines*.
